# Supplementary material for: Solution and solid state13C NMR and X-ray studies of genistein complexes with amines. Potential biological function of the C-7, C-5, and C-4′-OH groups
Source: Royal Society of Chemistry journal article supplement (doi:10.1039/b305991j), 2003-01-01
Supplement: b305991j-2.pdf [file b305991j-2.pdf]

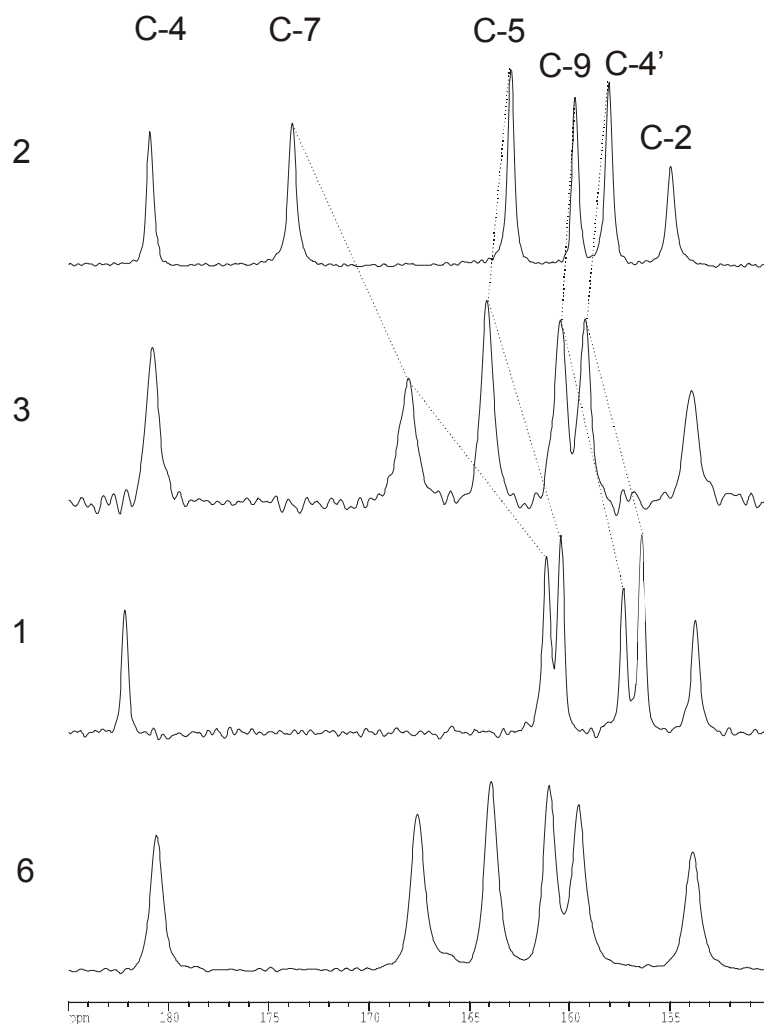

Fig. 1S Comparison of  $^{13}\text{C}$  solid state NMR spectra (expanded region) of **1** - **3**. The spectrum of **6** is shown for comparison. The assignments for **6** are as in **3** except that 9 and 4' are interchanged.
